# Supplementary material
Source: PubMed Central journal article supplement (PMC4516279)
Supplement: NIHMS117746-supplement-2_si_002.pdf [file NIHMS117746-supplement-2_si_002.pdf]

4700 MS/MS Precursor 1866 Spec #1=>A dvBC(32,0.5,0.1)[BP = 196.1,30]

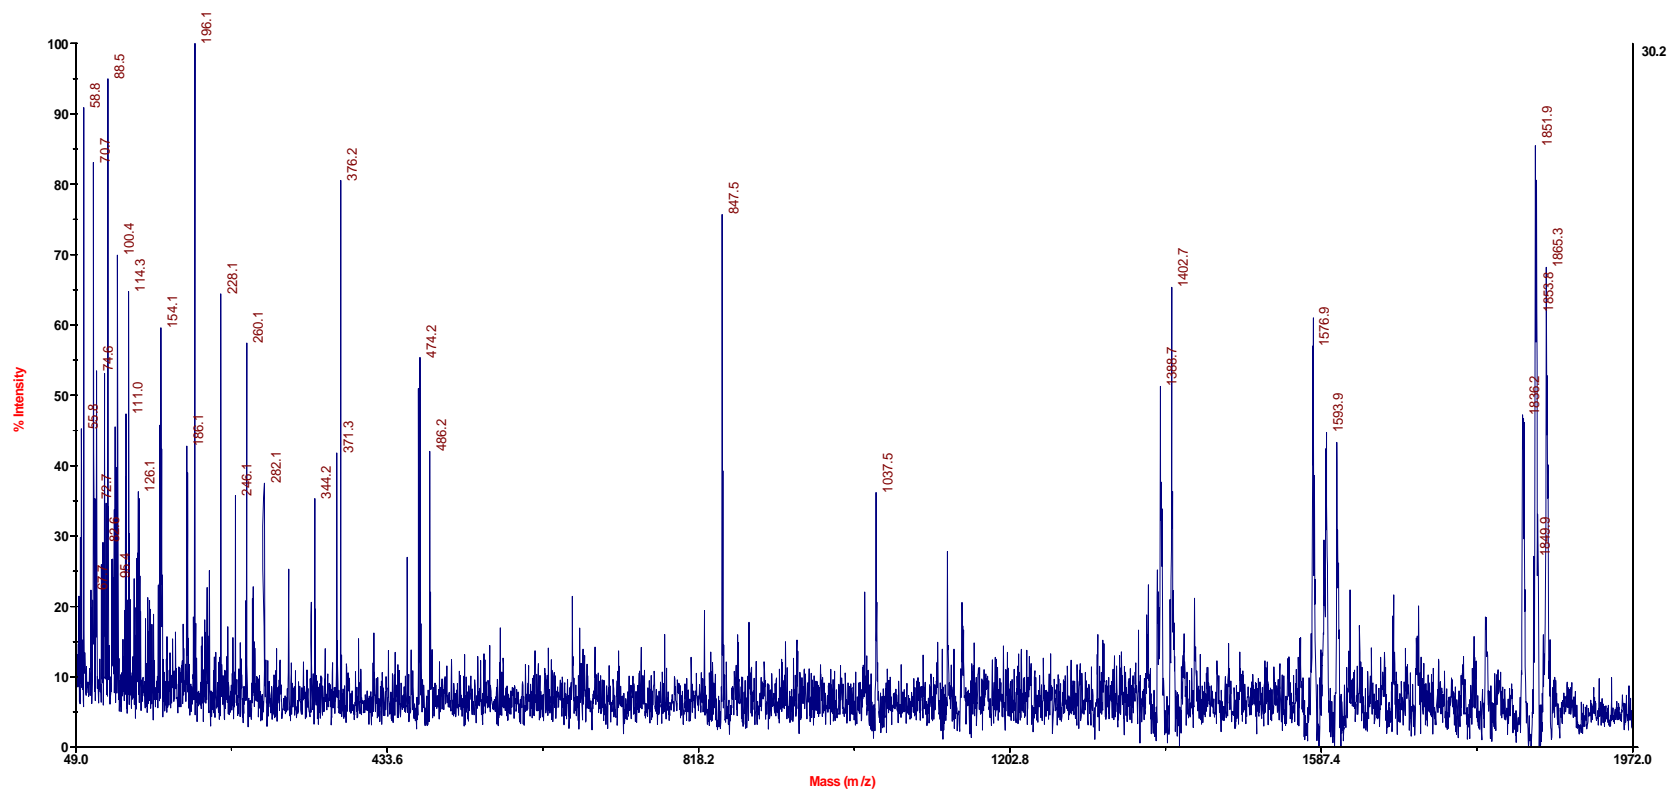

CID of 1866

4700 MS/MS Precursor 2040.5 Spec #1[BP = 1576.8, 410]

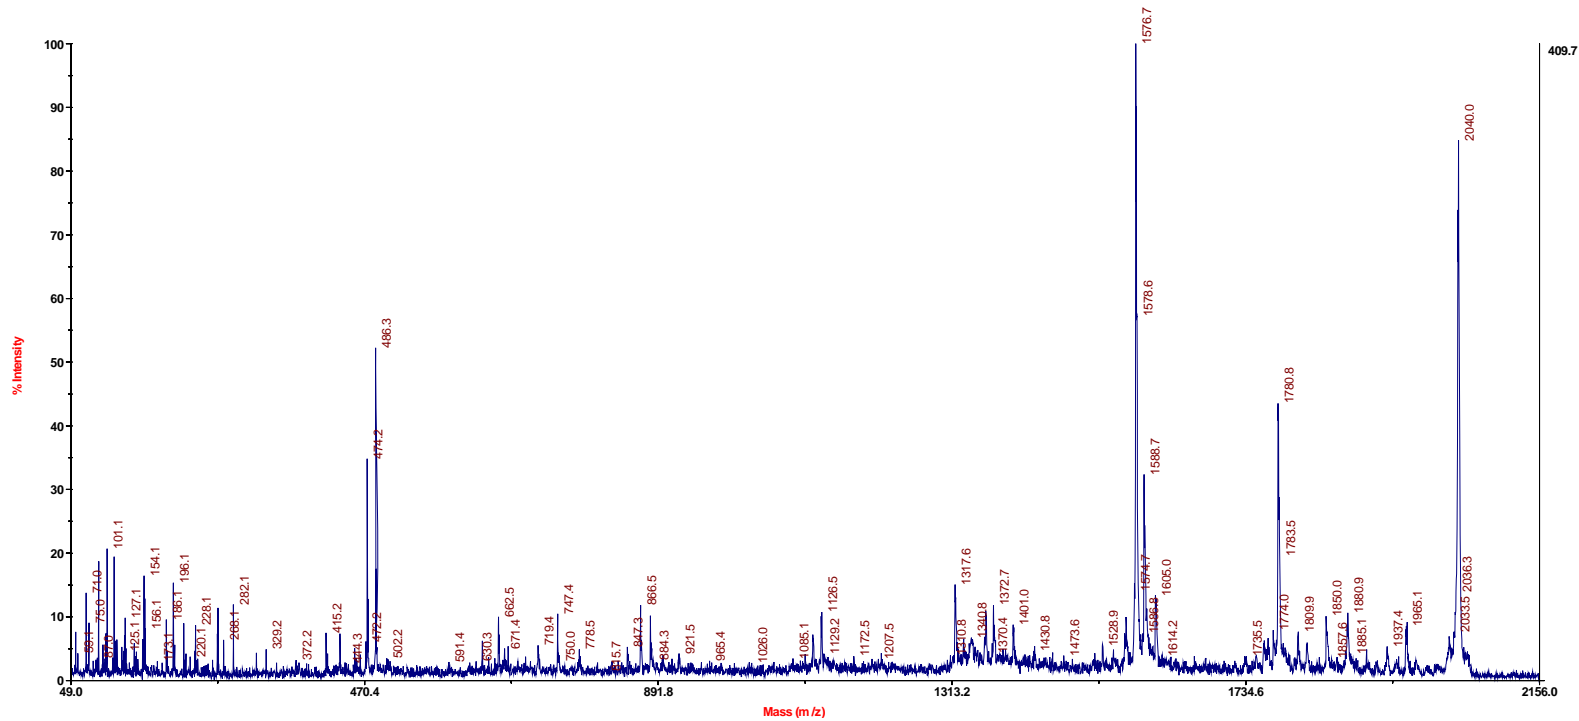

CID of 2040.5

4700 MS/MS Precursor 2070.6 Spec #1 [BP = 2080.2, 37]

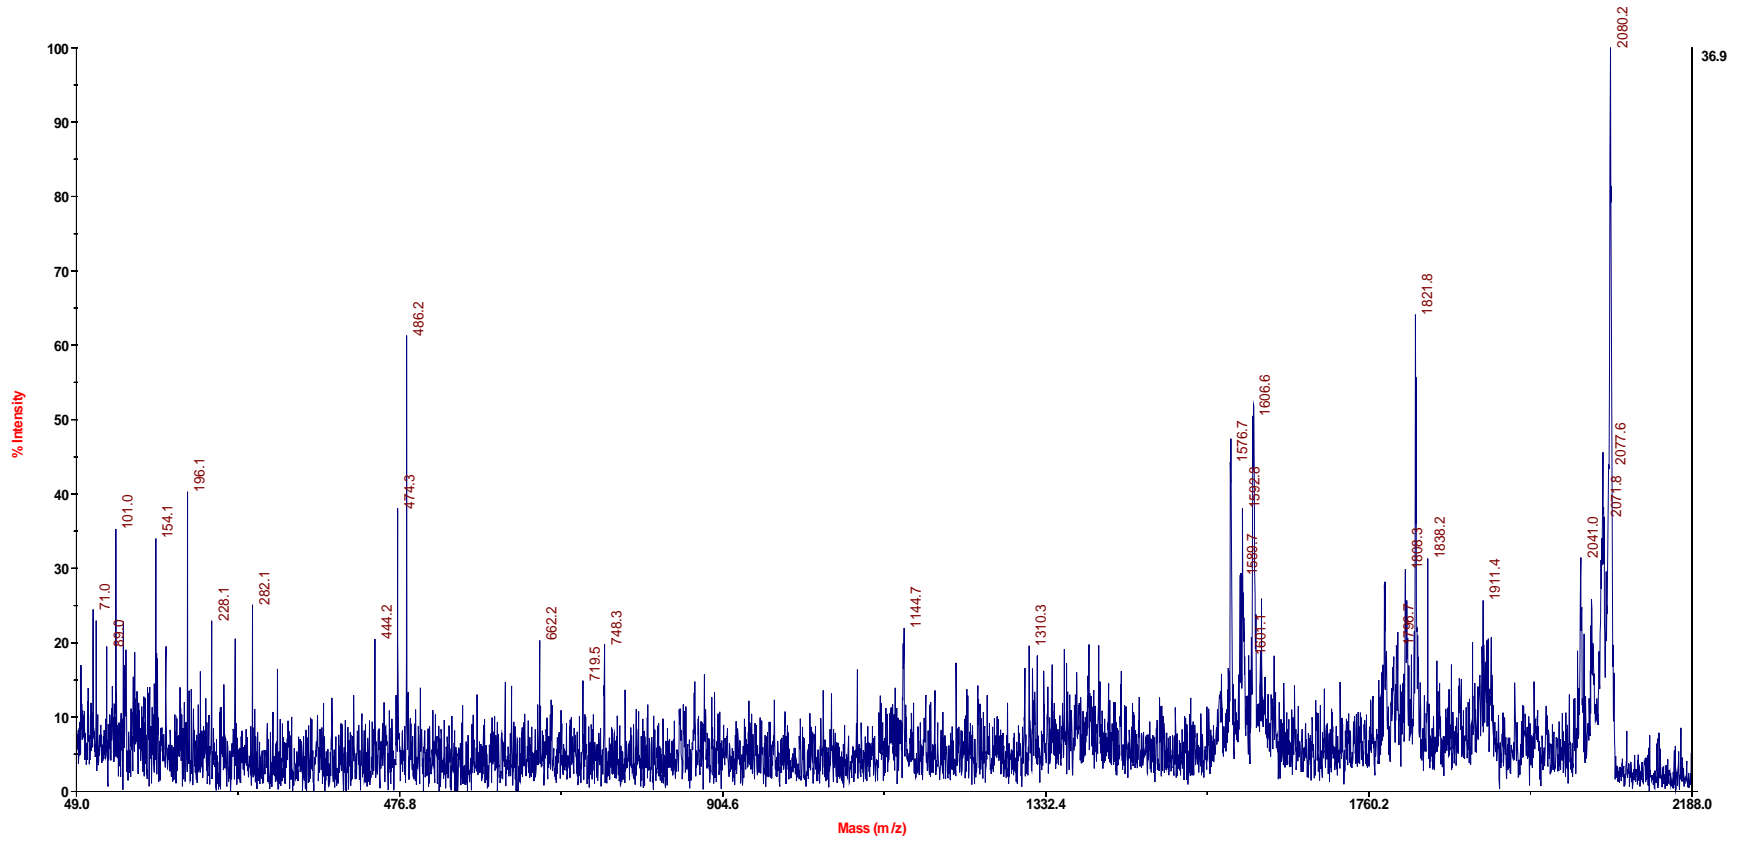

CID of 2070.6

4700 MS/MS Precursor 2227 Spec #1 [BP = 1767.6, 92]

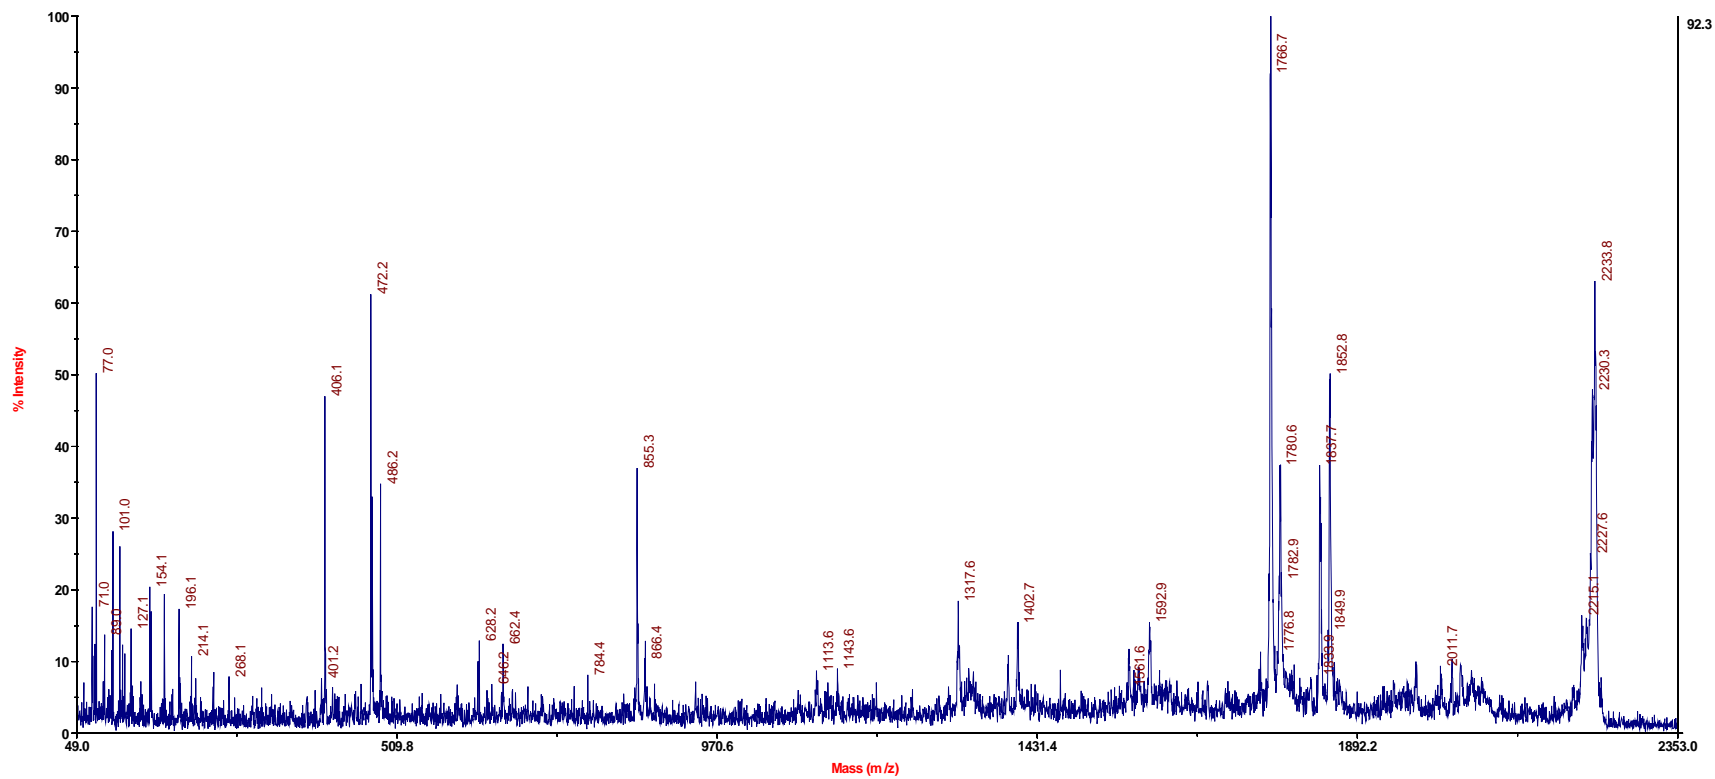

CID of 2227.6

4700 MS/MS Precursor 2244 Spec #1=>AdvBC(32,0,5,0.1)[BP= 2228.2, 118]

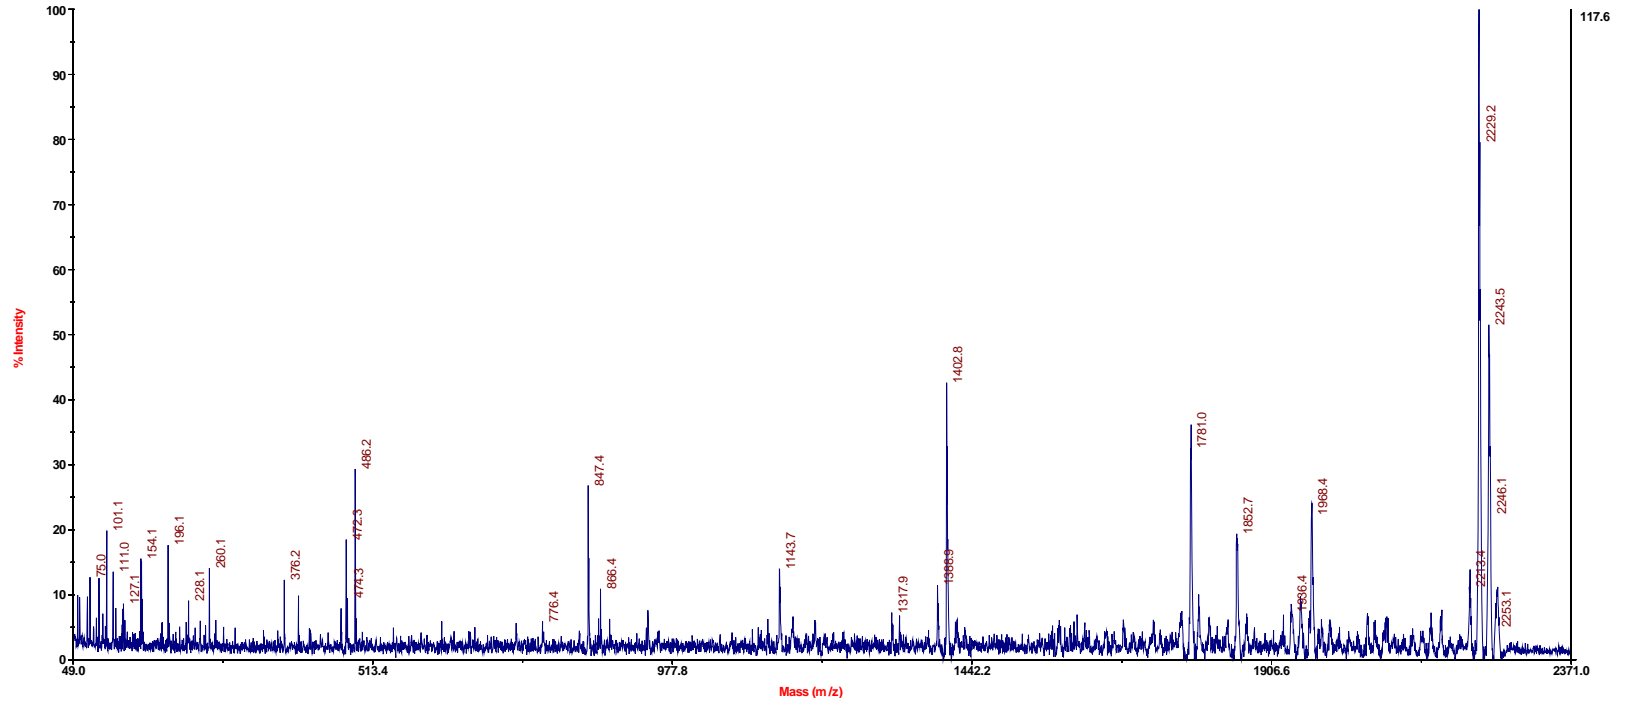

CID of 2244

4700 MSMS Precursor 2605.9 Spec #1 [BP = 2605.1, 147]

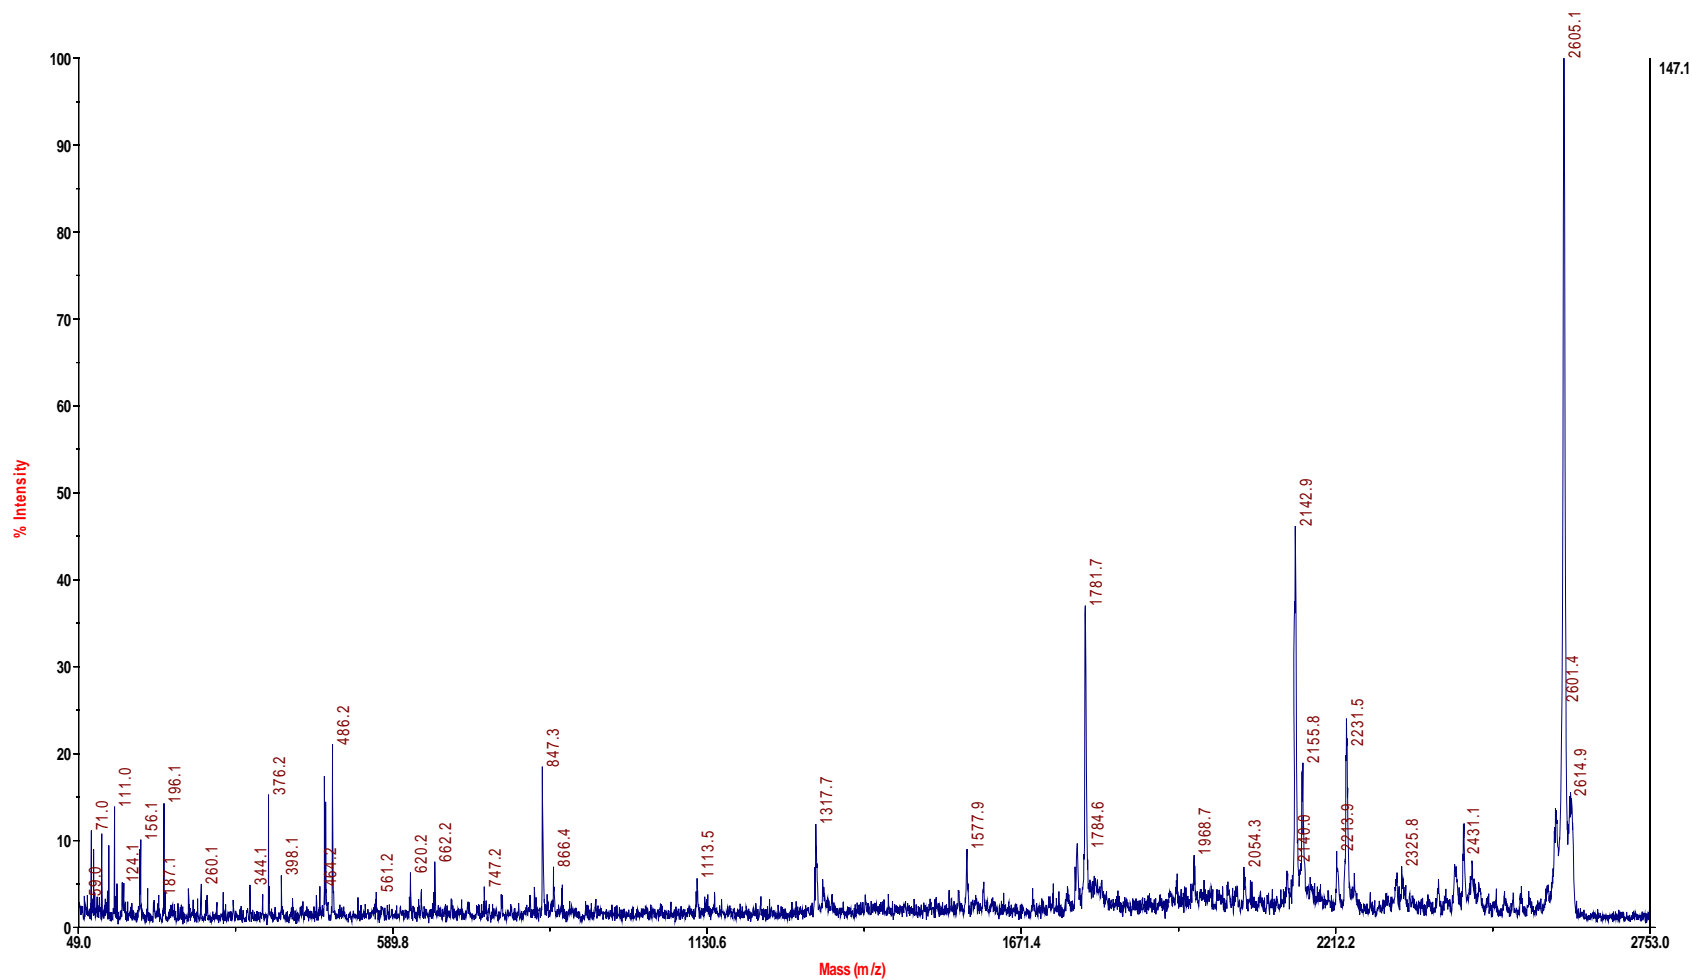

CID of 2605.9

4700 MS/MS Precursor 3085 Spec #1[BP = 376.2, 12]

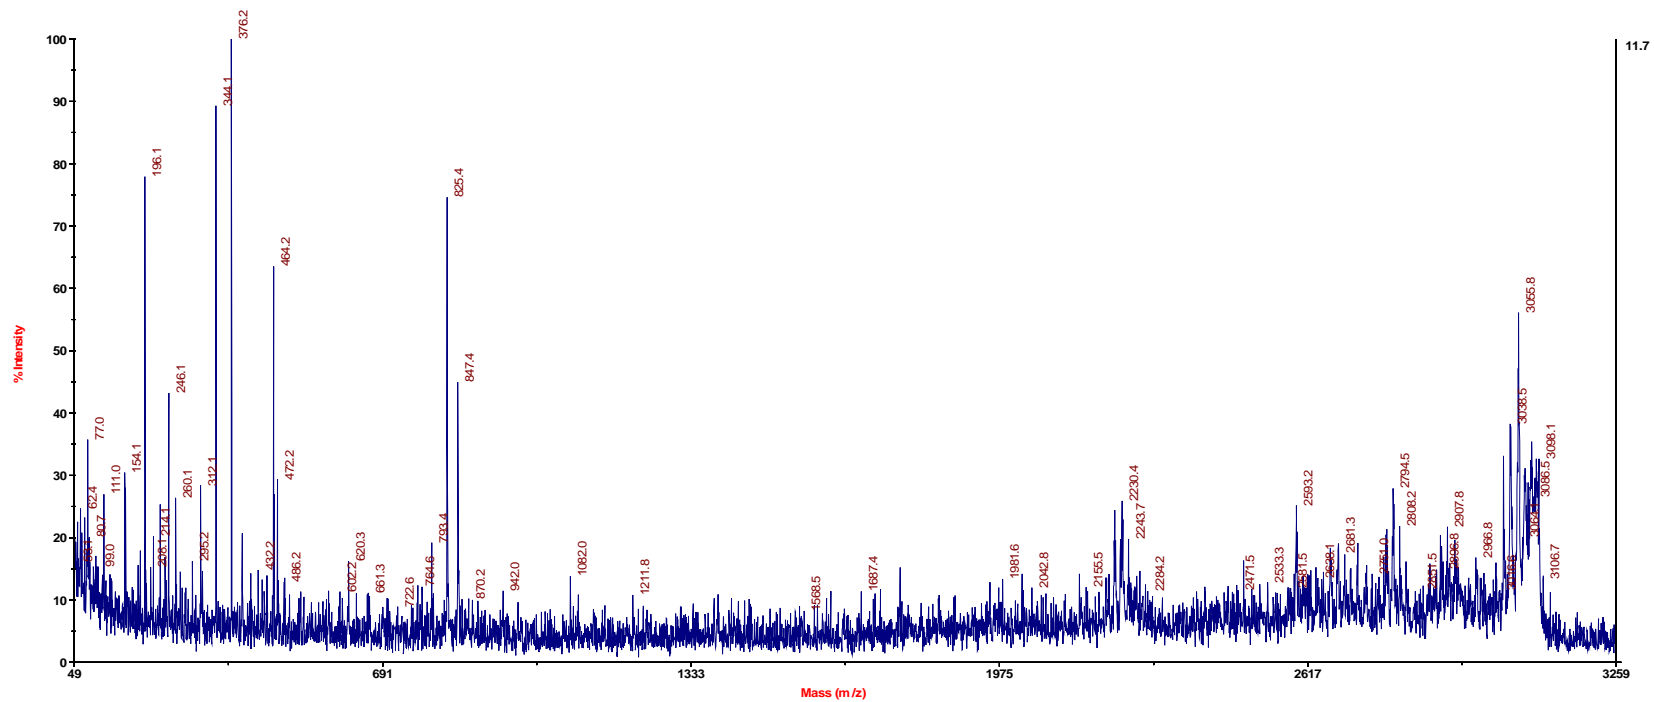

CID of 3085

4700 MSMS Precursor 3951 Spec #1 [BP= 825.4, 13]

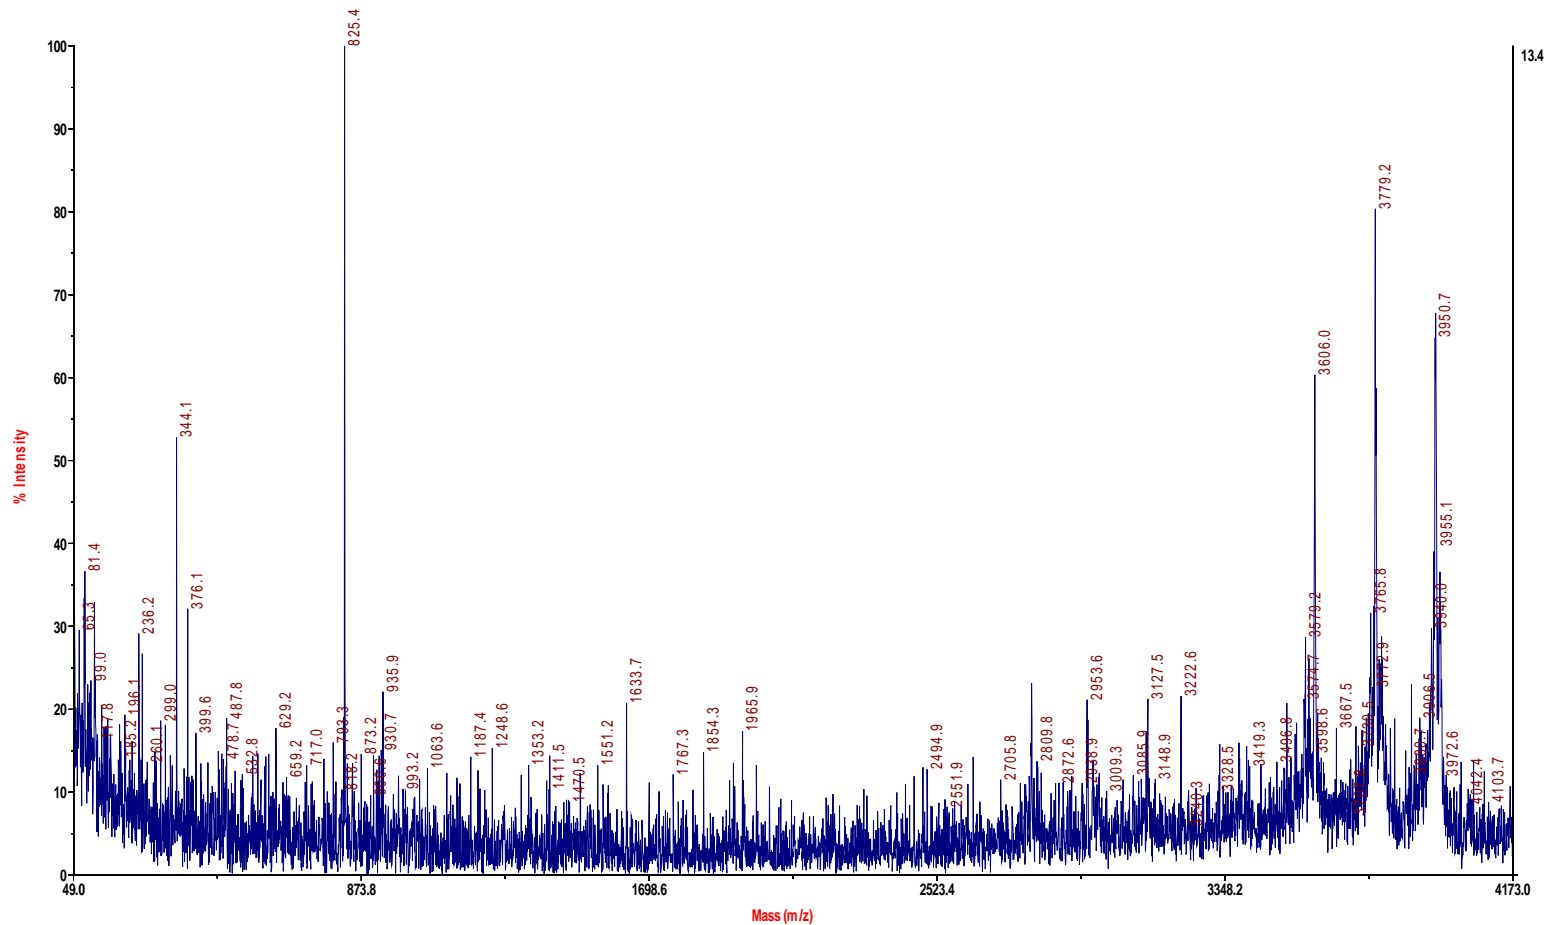

CID of 3951
